# Supplementary material for: Nucleotide polymorphism assay for the identification of west African group Bacillus anthracis: a lineage lacking anthrose
Source: PubMed Central journal article supplement (PMC6947953; doi:10.1186/s12866-019-1693-2), 2020-01-07
Supplement: 12866_2019_1693_MOESM3_ESM.pdf [file 12866_2019_1693_MOESM3_ESM.pdf]

Table S2. Cycle threshold values with 1 and 5 ng of DNA

| <b>Assay</b> | <b>Strain</b> | <b>DNA Conc.</b> | <b>Mean <math>C_T</math></b> | <b>Range</b> | <b>SD</b> |
|--------------|---------------|------------------|------------------------------|--------------|-----------|
| 892          | Sterne        | 1 ng             | 20.3                         | 20.0-20.7    | 0.31      |
| 892          | UF 01063      | 1 ng             | 19.3                         | 19.1-19.6    | 0.21      |
| 892          | Sterne        | 5 ng             | 18.0                         | 17.4-18.5    | 0.49      |
| 892          | UF 01063      | 5 ng             | 16.9                         | 16.8-16.9    | 0.06      |
| 1352         | Sterne        | 1 ng             | 21.2                         | 21.1-21.4    | 0.14      |
| 1352         | UF 01063      | 1 ng             | 20.5                         | 19.9-20.9    | 0.44      |
| 1352         | Sterne        | 5 ng             | 19.0                         | 18.8-19.2    | 0.19      |
| 1352         | UF 01063      | 5 ng             | 17.8                         | 17.0-18.1    | 0.51      |

\*SD- Standard deviation

Table S3. Cycle threshold values for dilution curve with Sterne DNA

| <b>DNA Conc.</b> | <b>892 Mean <math>C_T</math></b> | <b>892 SD*</b> | <b>1352 Mean <math>C_T</math></b> | <b>1352 SD*</b> |
|------------------|----------------------------------|----------------|-----------------------------------|-----------------|
| 100 pg           | 22.6                             | 0.06           | 23.5                              | 0.05            |
| 10 pg            | 26.2                             | 0.01           | 27.4                              | 0.20            |
| 1 pg             | 29.6                             | 0.07           | 31                                | 0.04            |
| 100 fg           | 33.8                             | 0.16           | 34.6                              | 0.32            |
| 10 fg            | 37.1                             | 0.13           | 39.1                              | 0.14            |

\*SD- Standard deviation
