# Supplementary material for: Nucleotide polymorphism assay for the identification of west African group Bacillus anthracis: a lineage lacking anthrose
Source: PubMed Central journal article supplement (PMC6947953; doi:10.1186/s12866-019-1693-2), 2020-01-07
Supplement: 12866_2019_1693_MOESM5_ESM.pdf [file 12866_2019_1693_MOESM5_ESM.pdf]

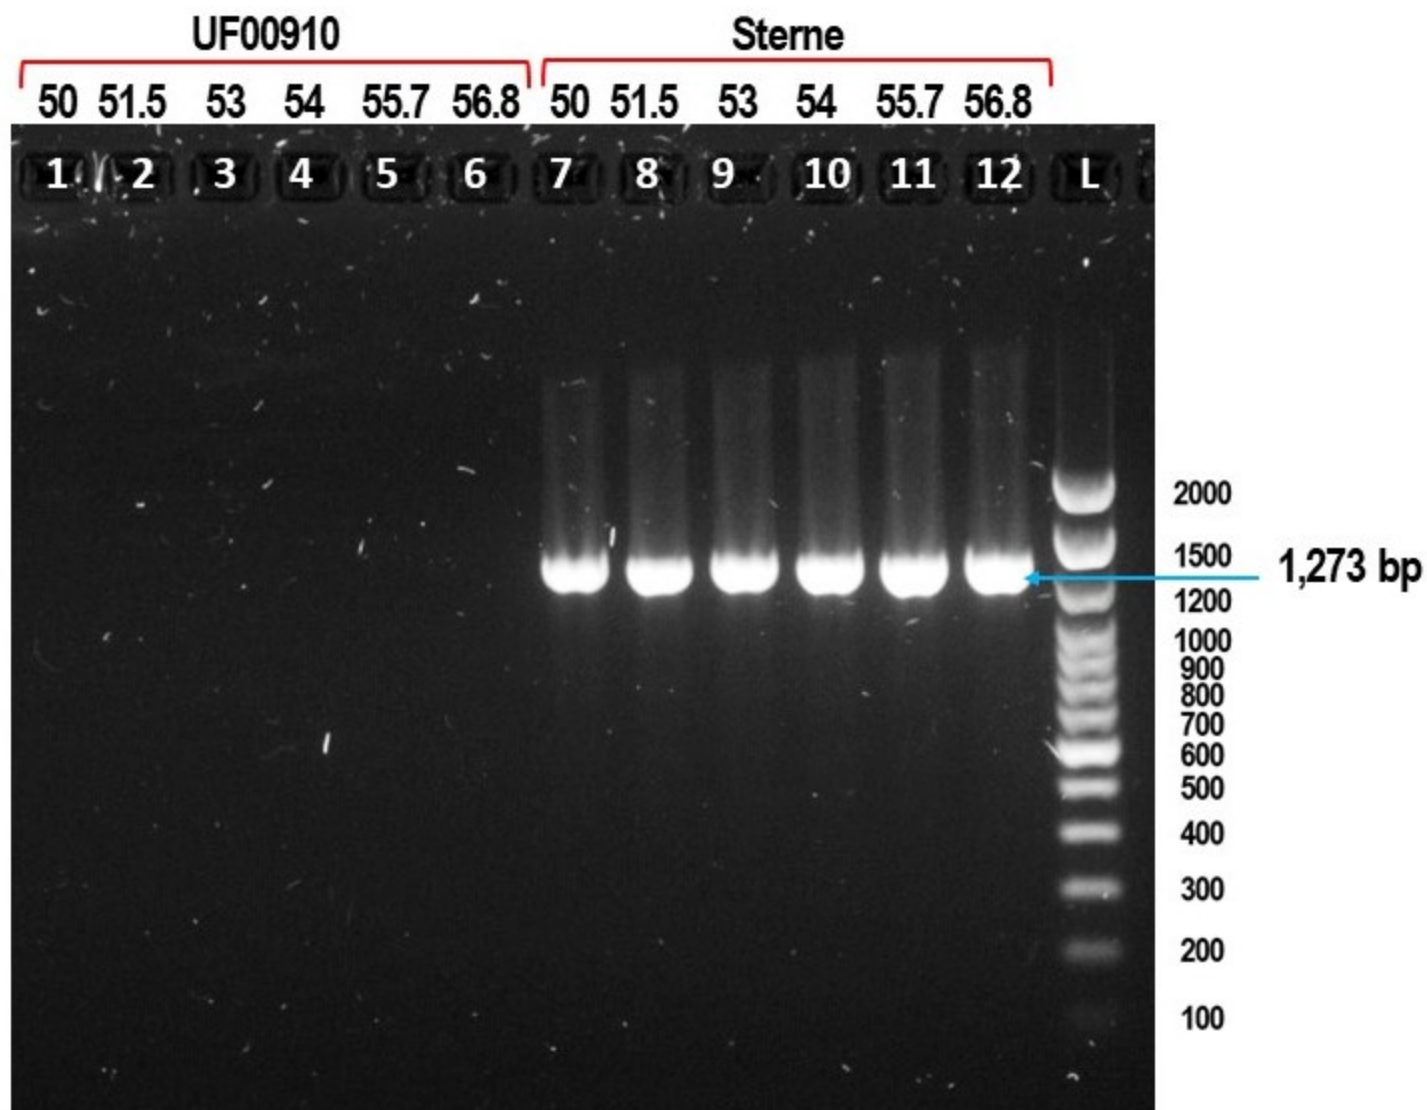

Fig. S3
