# Supplementary material for: Nucleotide polymorphism assay for the identification of west African group Bacillus anthracis: a lineage lacking anthrose
Source: BMC Microbiol. 2020 Jan 7;20:6. doi: 10.1186/s12866-019-1693-2 (PMC6947953; doi:10.1186/s12866-019-1693-2)
Supplement: Supplementary file 2 — Additional file 2: Figure S1. Alignment of all B. anthracis anthrose operons showing 97–100% to Sterne. The anthrose operon of all sequenced B. anthracis strains were aligned to sequences from Sterne using CLC viewer. [file 12866_2019_1693_MOESM2_ESM.pdf]

|                        | 400                                                                                              | 420 | 440 | 460 |
|------------------------|--------------------------------------------------------------------------------------------------|-----|-----|-----|
| NR1V01000001.1(Sterne) | AGAACAAGCCTTAATTGGATTACCAGAAATTACGTTAGGTCTATTTCTGGGGCTGGAGGAACTCAGCGCTTACCTAGATTAATTGGAGAAGGAAA  |     |     |     |
| AAE001000022.1         | AGAACAAGCCTTAAATTGGATTACCAGAAATTACGTTAGGTCTATTTCTGGGGCTGGAGGAACTCAGCGCTTACCTAGATTAATTGGAGAAGGAAA |     |     |     |
| ALNY01000049.1         | AGAACAAGCCTTAATTGGATTACCAGAAATTACGTTAGGTCTATTTCTGGGGCTGGAGGAACTCAGCGCTTACCTAGATTAATTGGAGAAGGAAA  |     |     |     |
| AGQP01000002.1         | AGAACAAGCCTTAATTGGATTACCAGAAATTACGTTAGGTCTATTTCTGGGGCTGGAGGAACTCAGCGCTTACCTAGATTAATTGGAGAAGGAAA  |     |     |     |
| JSZS01000049.1         | AGAACAAGCCTTAAATTGGATTACCAGAAATTACGTTAGGTCTATTTCTGGGGCTGGAGGAACTCAGCGCTTACCTAGATTAATTGGAGAAGGAAA |     |     |     |
| JTAG01000063.1         | AGAACAAGCCTTAAATTGGATTACCAGAAATTACGTTAGGTCTATTTCTGGGGCTGGAGGAACTCAGCGCTTACCTAGATTAATTGGAGAAGGAAA |     |     |     |
| ABLH01000027.1         | AGAACAAGCCTTAATTGGATTACCAGAAATTACGTTAGGTCTATTTCTGGGGCTGGAGGAACTCAGCGCTTACCTAGATTAATTGGAGAAGGAAA  |     |     |     |
| AAEN01000017.1         | AGAACAAGCCTTAATTGGATTACCAGAAATTACGTTAGGTCTATTTCTGGGGCTGGAGGAACTCAGCGCTTACCTAGATTAATTGGAGAAGGAAA  |     |     |     |
| NZ_ABKG01000001.1      | AGAACAAGCCTTAAATTGGATTACCAGAAATTACGTTAGGTCTATTTCTGGGGCTGGAGGAACTCAGCGCTTACCTAGATTAATTGGAGAAGGAAA |     |     |     |
| QAEI01000003.1         | AGAACAAGCCTTAAATTGGATTACCAGAAATTACGTTAGGTCTATTTCTGGGGCTGGAGGAACTCAGCGCTTACCTAGATTAATTGGAGAAGGAAA |     |     |     |
| NZ_AAEQ01000046.1      | AGAACAAGCCTTAAATTGGATTACCAGAAATTACGTTAGGTCTATTTCTGGGGCTGGAGGAACTCAGCGCTTACCTAGATTAATTGGAGAAGGAAA |     |     |     |
| AMDT01000002.1         | AGAACAAGCCTTAATTGGATTACCAGAAATTACGTTAGGTCTATTTCTGGGGCTGGAGGAACTCAGCGCTTACCTAGATTAATTGGAGAAGGAAA  |     |     |     |
| JMPU01000016.1         | AGAACAAGCCTTAAATTGGATTACCAGAAATTACGTTAGGTCTATTTCTGGGGCTGGAGGAACTCAGCGCTTACCTAGATTAATTGGAGAAGGAAA |     |     |     |
| QAEI01000001.1         | AGAACAAGCCTTAAATTGGATTACCAGAAATTACGTTAGGTCTATTTCTGGGGCTGGAGGAACTCAGCGCTTACCTAGATTAATTGGAGAAGGAAA |     |     |     |
| QAEI01000002.1         | AGAACAAGCCTTAAATTGGATTACCAGAAATTACGTTAGGTCTATTTCTGGGGCTGGAGGAACTCAGCGCTTACCTAGATTAATTGGAGAAGGAAA |     |     |     |
| JHDS02000015.1         | AGAACAAGCCTTAATTGGATTACCAGAAATTACGTTAGGTCTATTTCTGGGGCTGGAGGAACTCAGCGCTTACCTAGATTAATTGGAGAAGGAAA  |     |     |     |
| PVLH01000002.1         | AGAACAAGCCTTAAATTGGATTACCAGAAATTACGTTAGGTCTATTTCTGGGGCTGGAGGAACTCAGCGCTTACCTAGATTAATTGGAGAAGGAAA |     |     |     |
| MVOA01000067.1         | AGAACAAGCCTTAAATTGGATTACCAGAAATTACGTTAGGTCTATTTCTGGGGCTGGAGGAACTCAGCGCTTACCTAGATTAATTGGAGAAGGAAA |     |     |     |
| QAEH01000002.1         | AGAACAAGCCTTAAATTGGATTACCAGAAATTACGTTAGGTCTATTTCTGGGGCTGGAGGAACTCAGCGCTTACCTAGATTAATTGGAGAAGGAAA |     |     |     |
| RQWM01000005.1         | AGAACAAGCCTTAAATTGGATTACCAGAAATTACGTTAGGTCTATTTCTGGGGCTGGAGGAACTCAGCGCTTACCTAGATTAATTGGAGAAGGAAA |     |     |     |
| LGCD01000038.1         | AGAACAAGCCAGAATTGACTAACAGAAATCACACTAGCAATAATACAGGAGCAGGAGGAAACGACAGCGCTTACCAGATTAATTGGAGAAGGAAA  |     |     |     |
| LGCC01000044.1         | AGAACAAGCCAGAATTGACTAACAGAAATCACACTAGCAATAATACAGGAGCAGGAGGAAACGACAGCGCTTACCAGATTAATTGGAGAAGGAAA  |     |     |     |
| Consensus              | AGAACAAGCCTTAATTGGATTACCAGAAATTACGTTAGGTCTATTTCTGGGGCTGGAGGAACTCAGCGCTTACCTAGATTAATTGGAGAAGGAAA  |     |     |     |
| Conservation           |                                                                                                  |     |     |     |

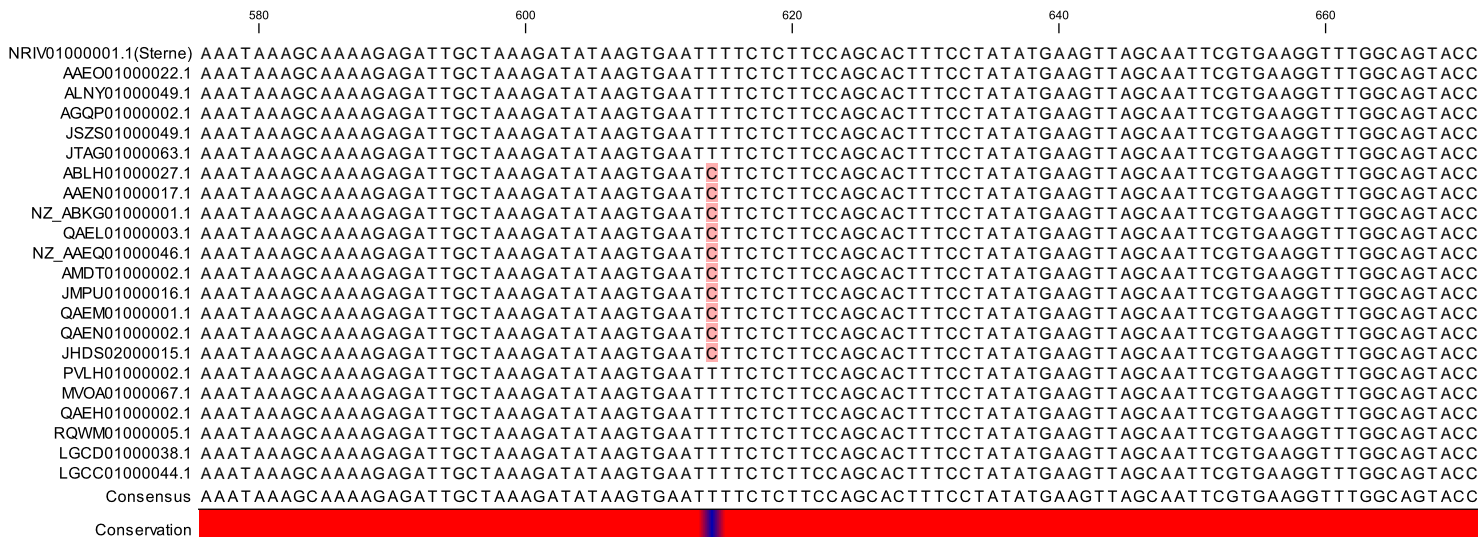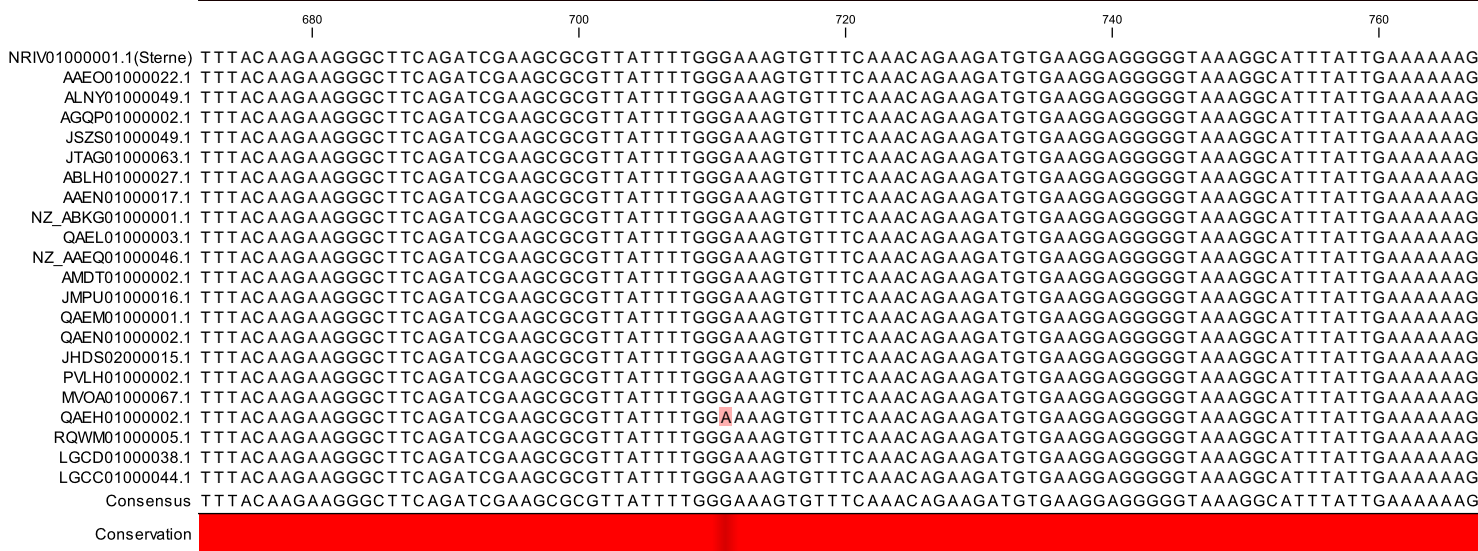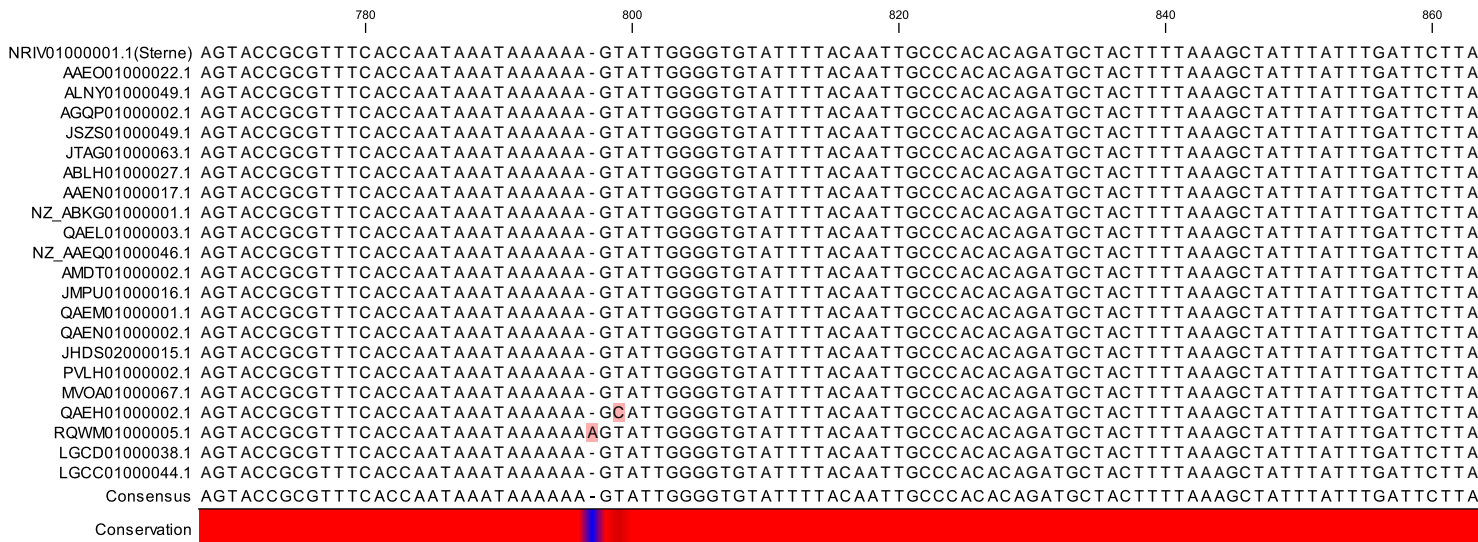





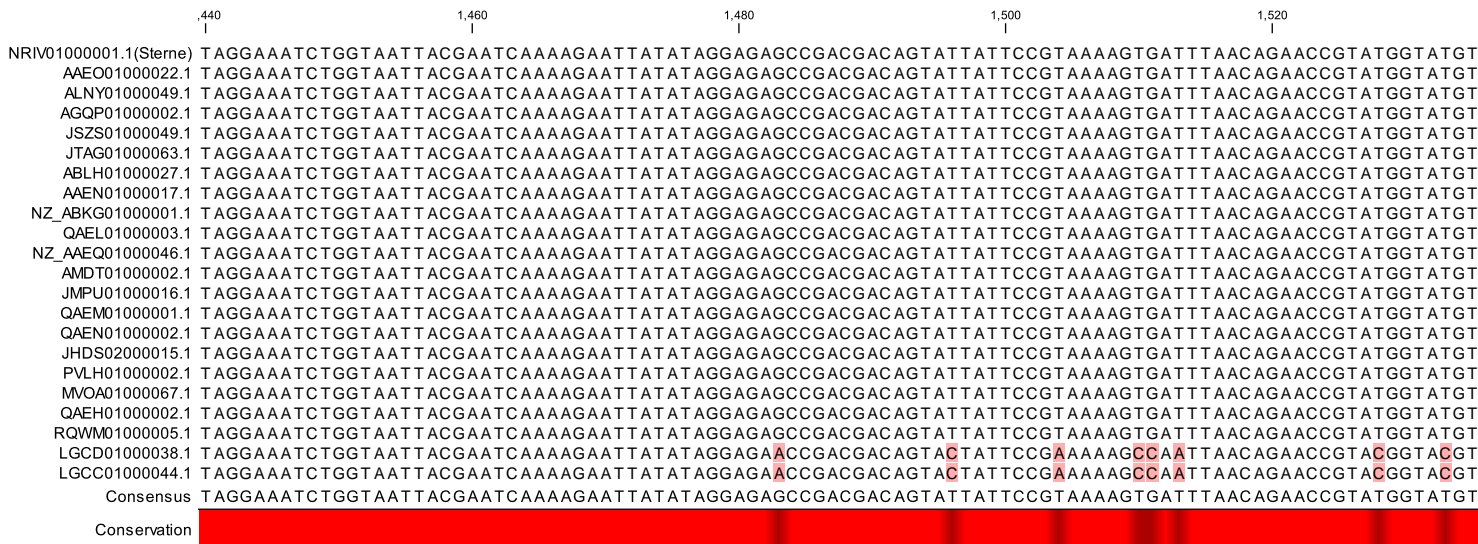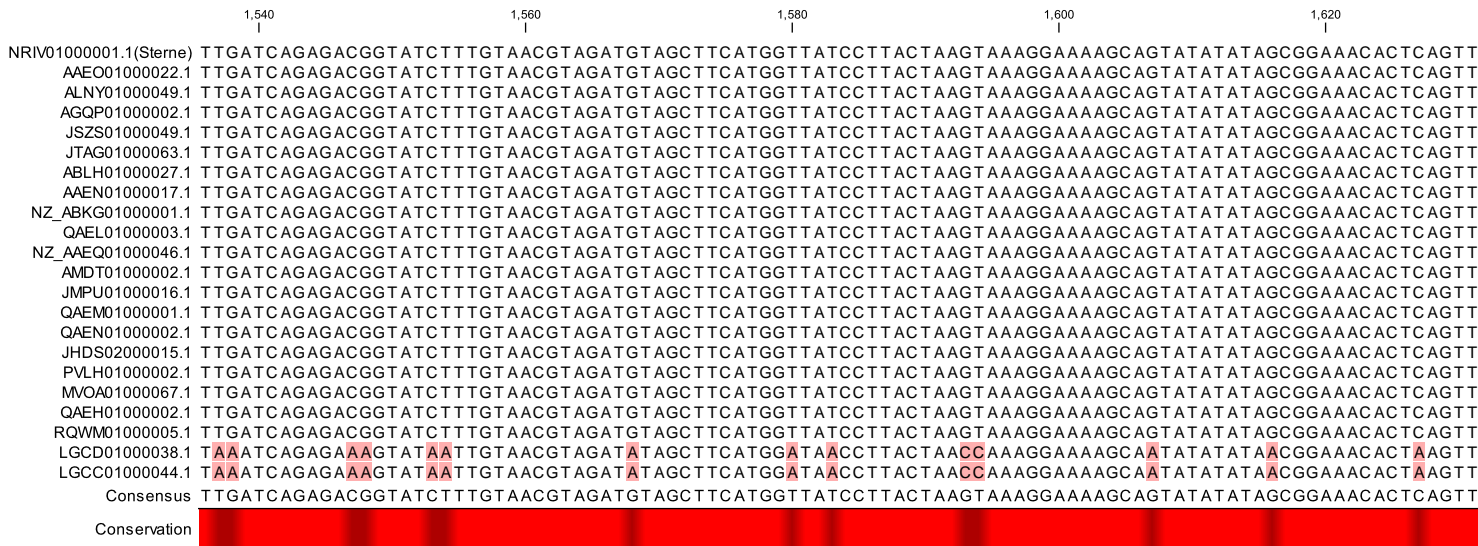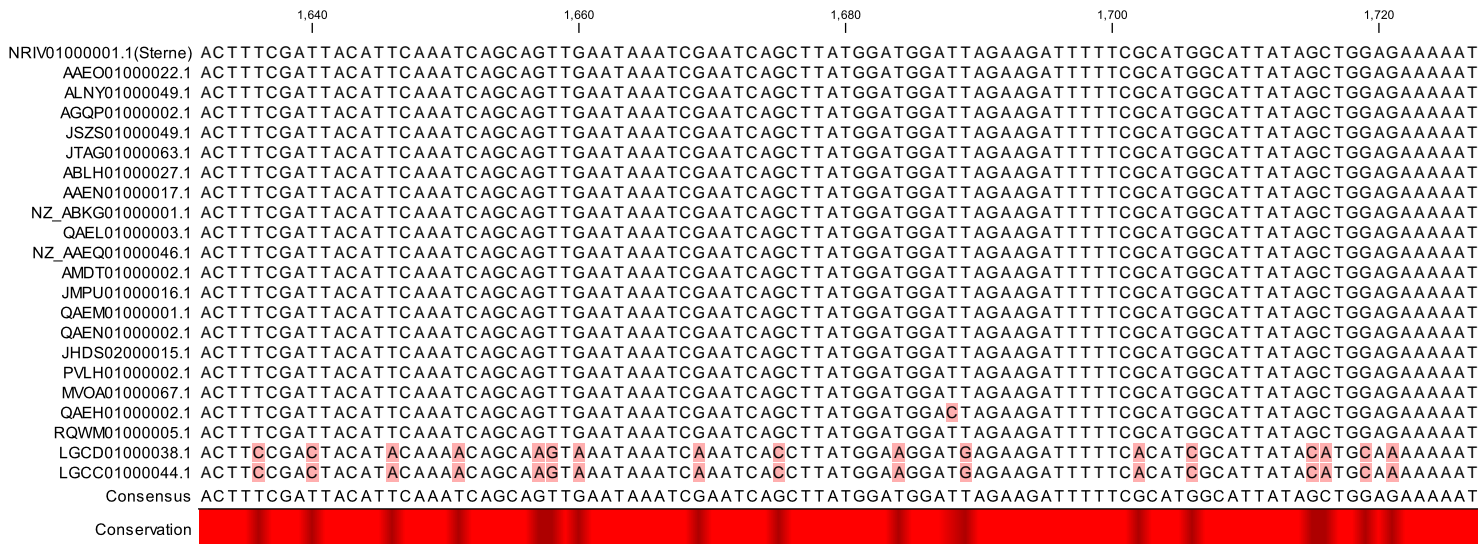







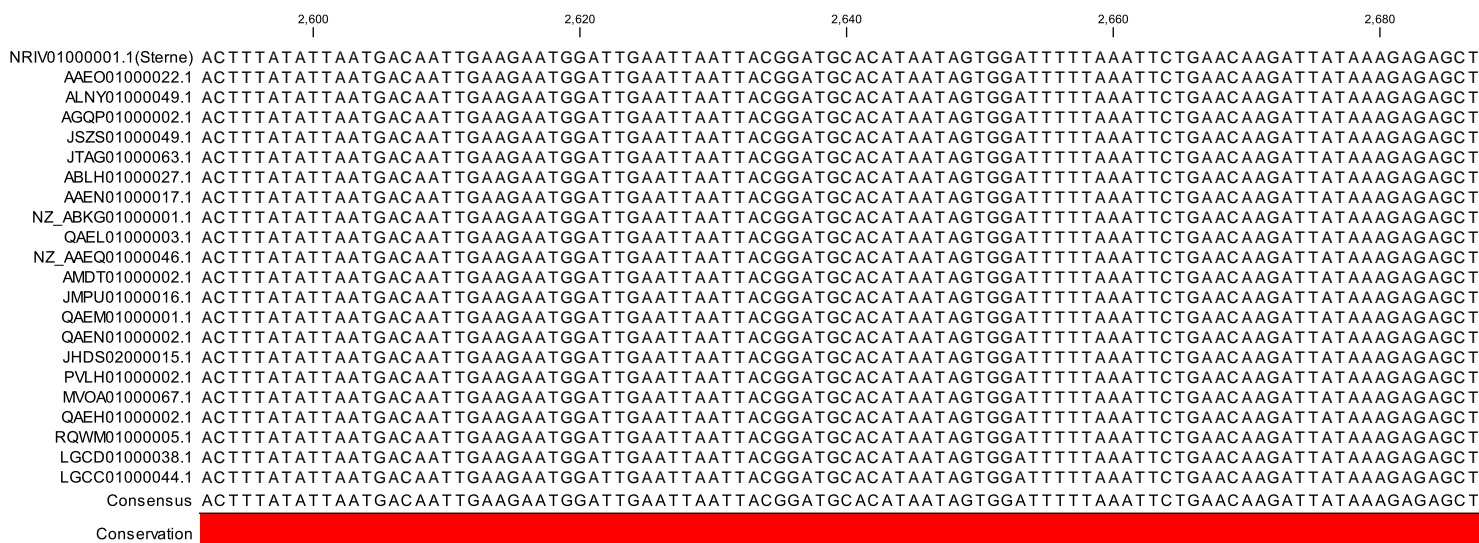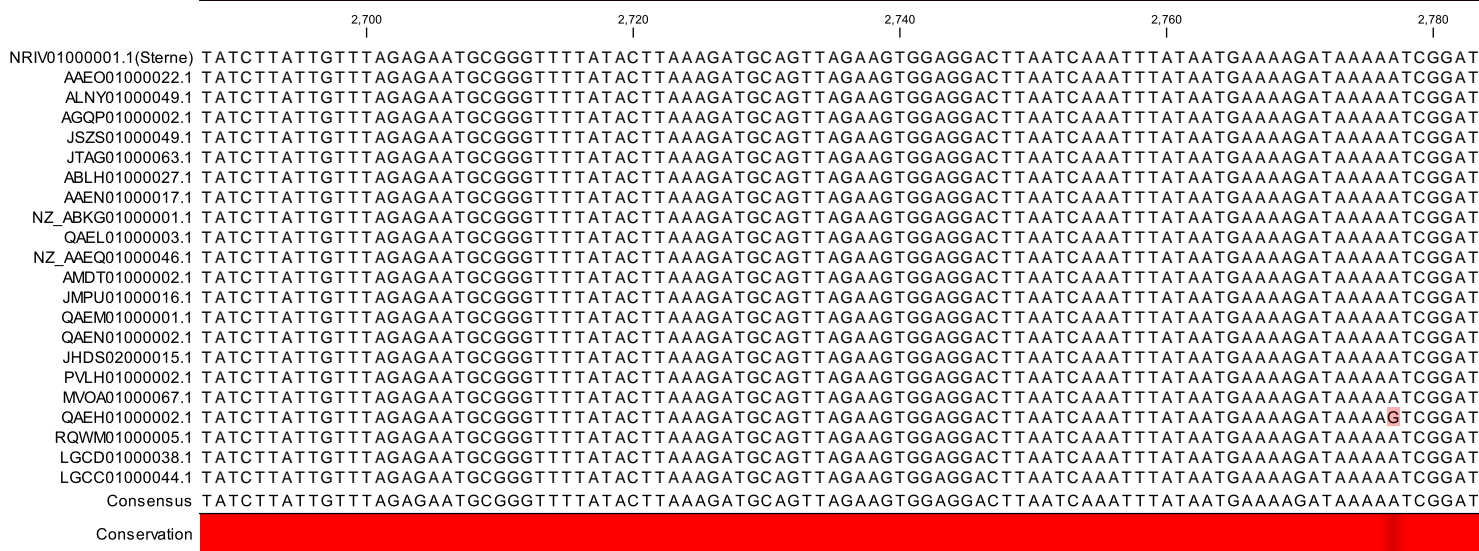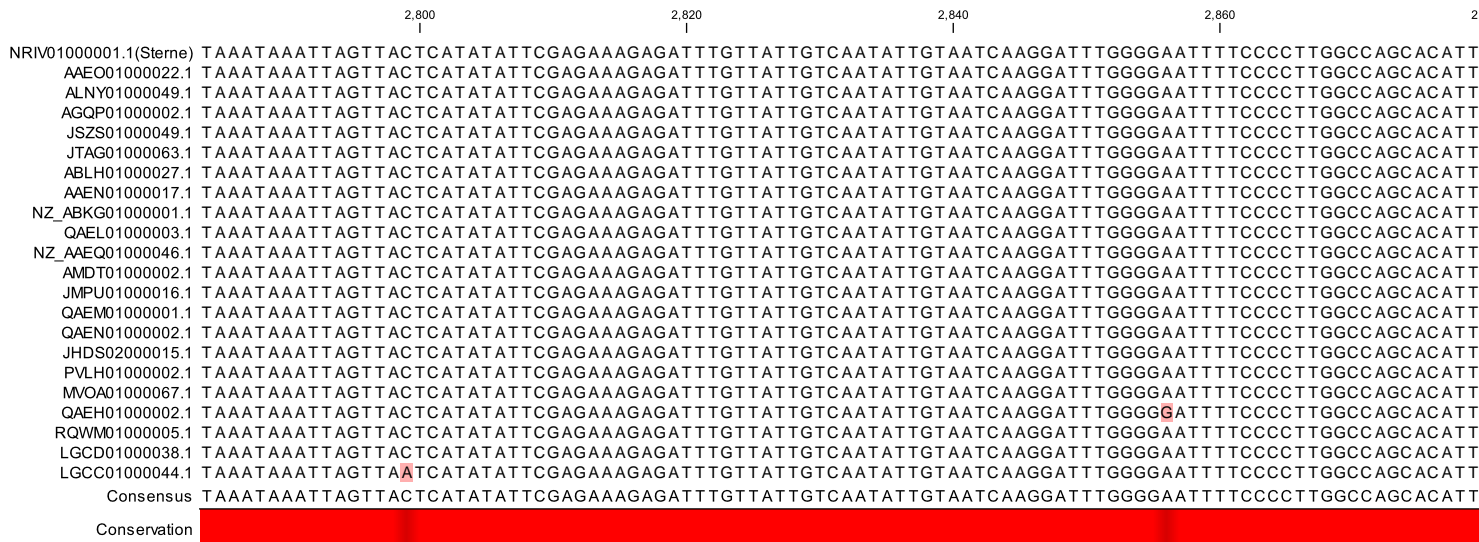

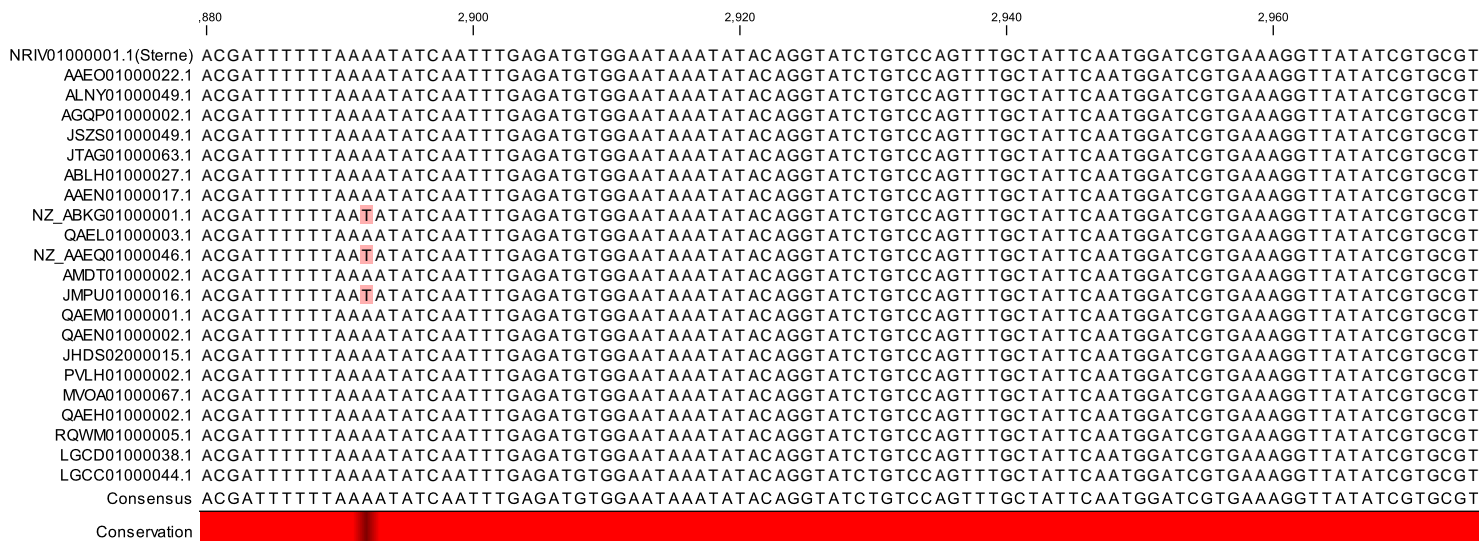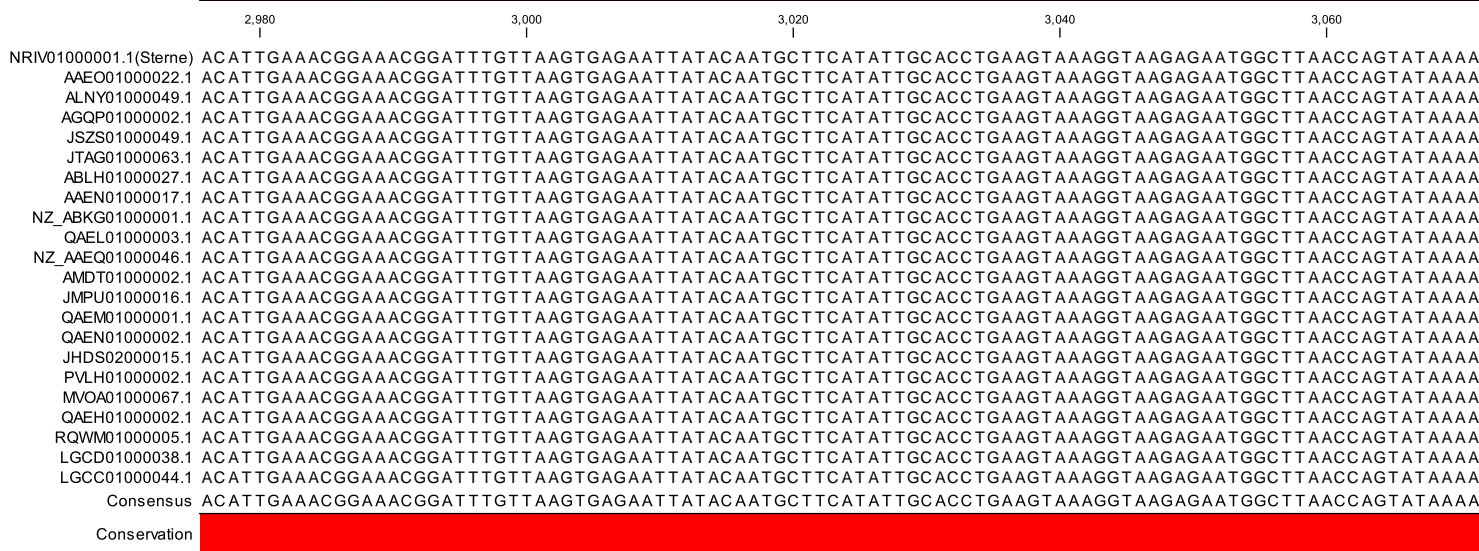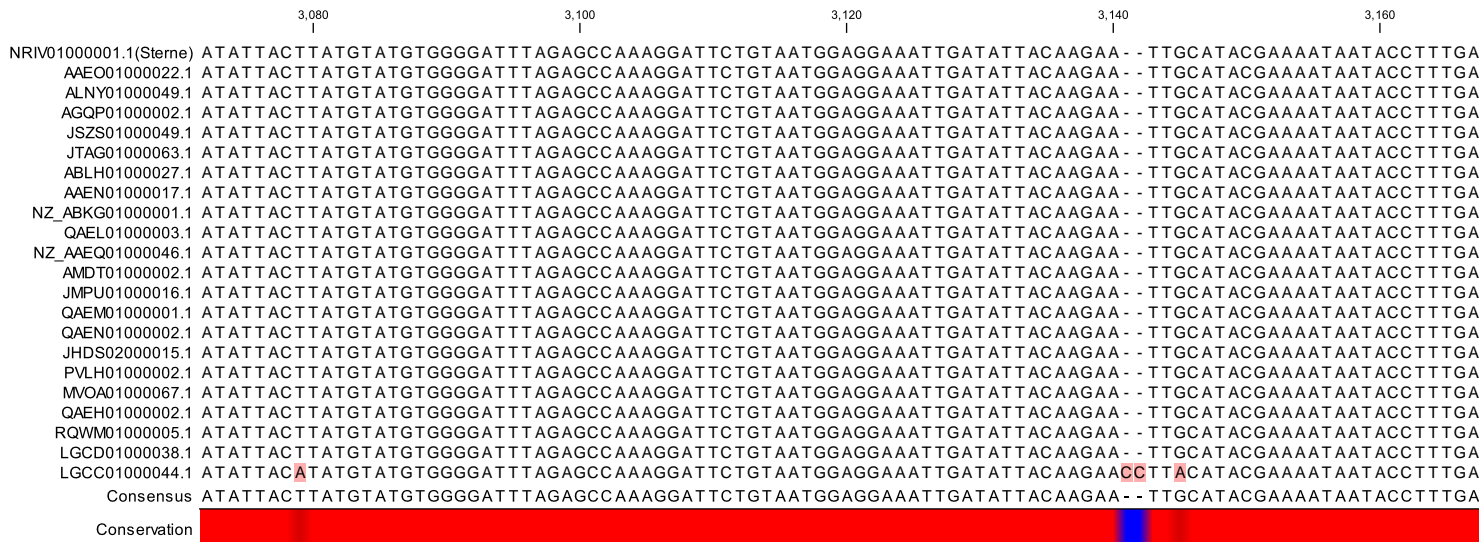



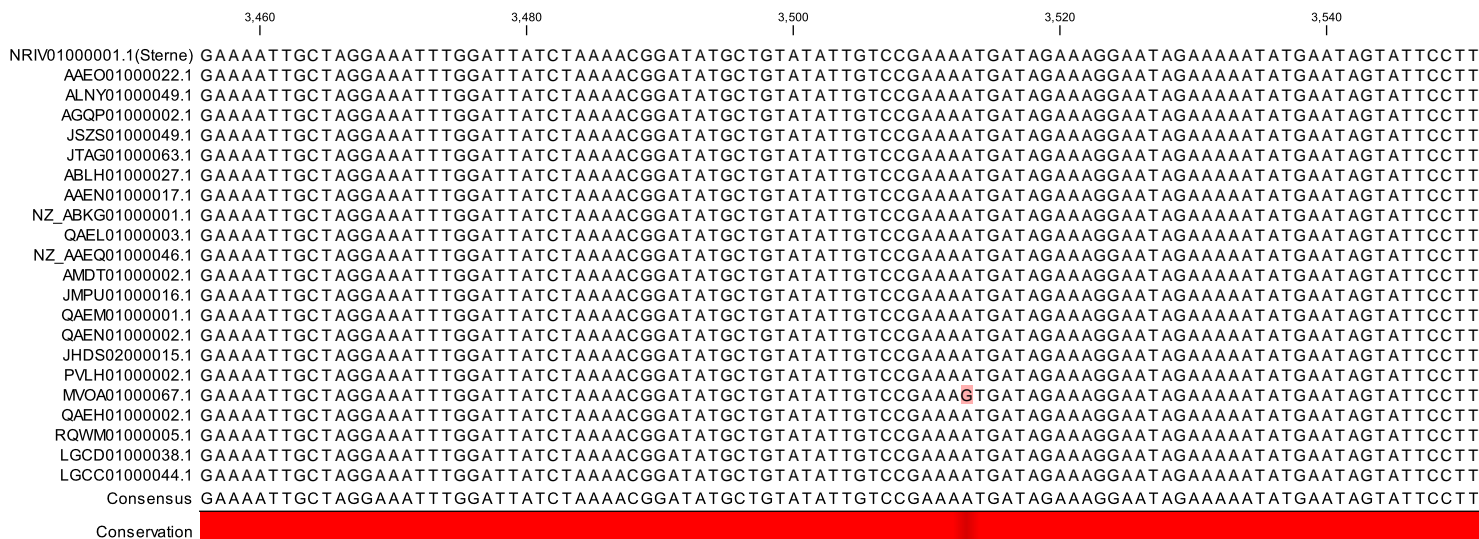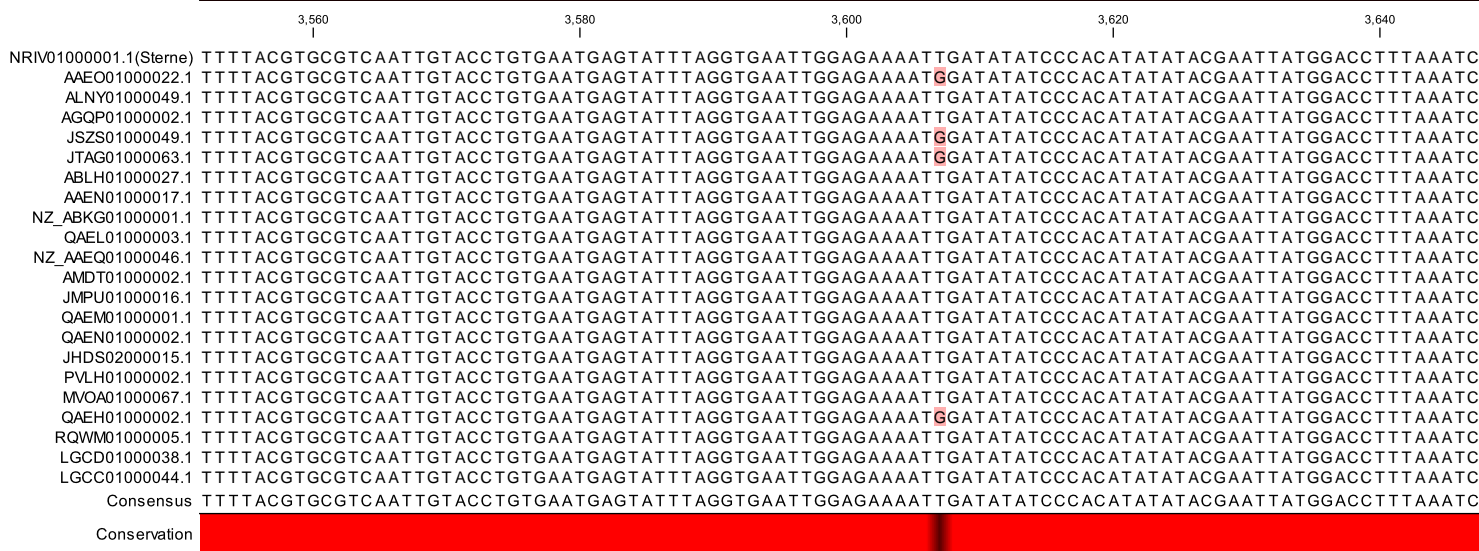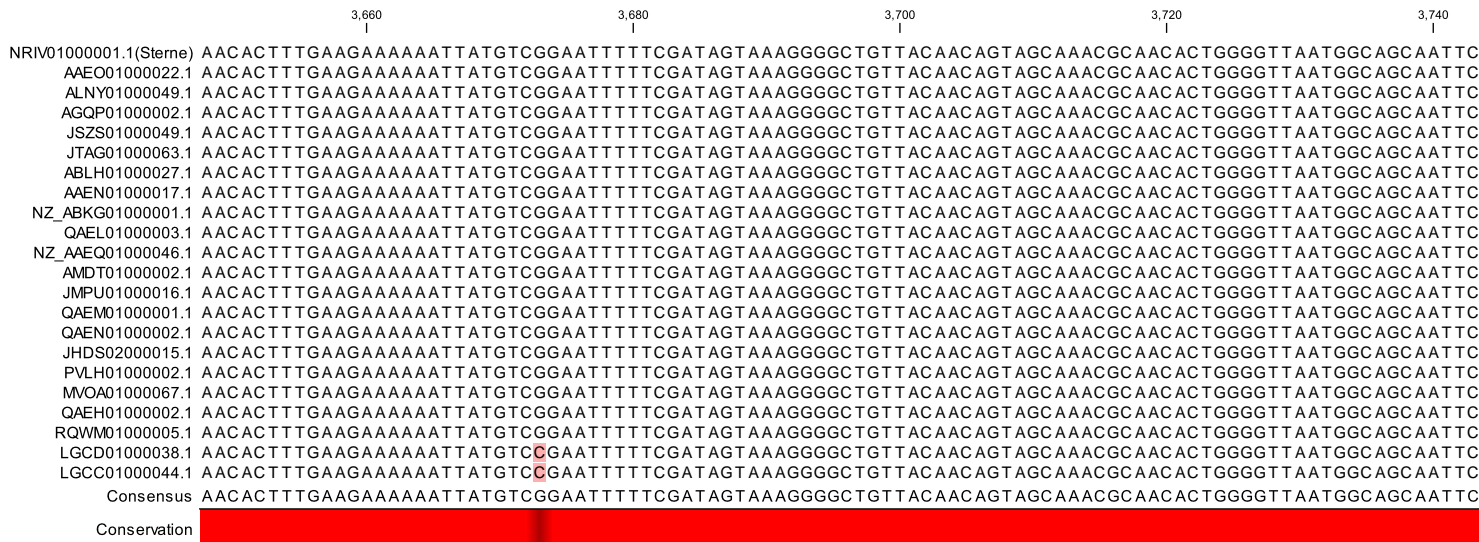



Conservation

[illegible]



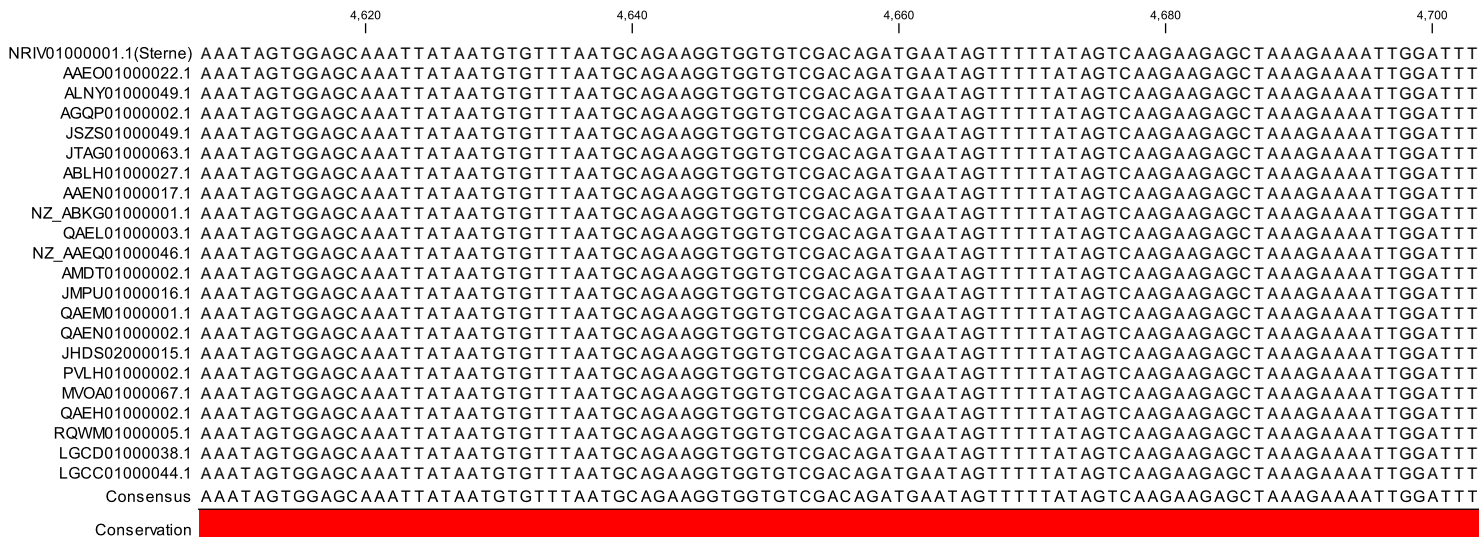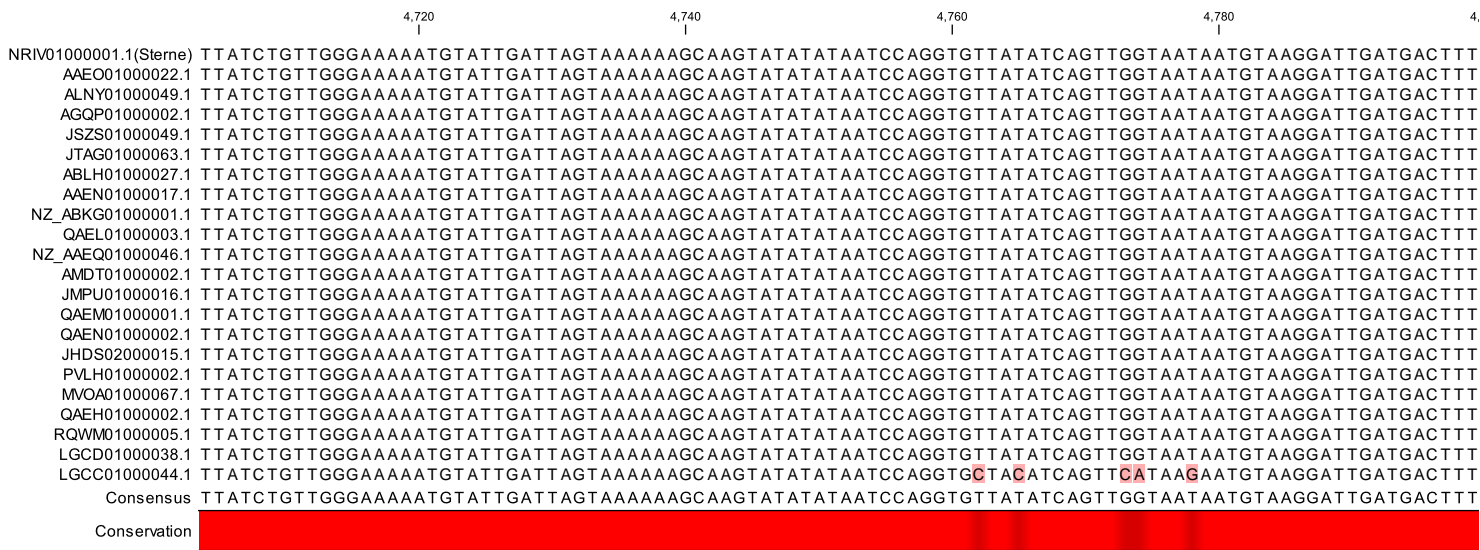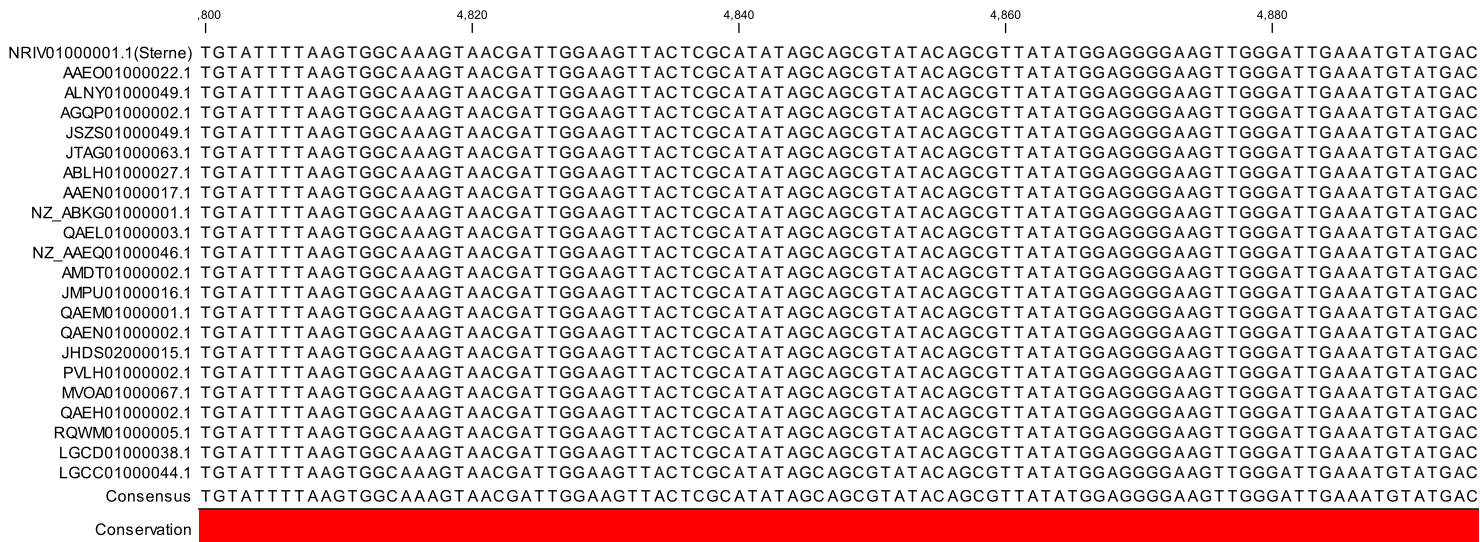



|                        | 5,200                                       | 5,220 |  |
|------------------------|---------------------------------------------|-------|--|
|                        |                                             |       |  |
| NRIV01000001.1(Sterne) | GTAGAATTAGAAAAATGAATTTTTAAAAAGTATGAACTCTTGA | 5210  |  |
| AAEO01000022.1         | GTAGAATTAGAAAAATGAATTTTTAAAAAGTATGAACTCTTGA | 5210  |  |
| ALNY01000049.1         | GTAGAATTAGAAAAATGAATTTTTAAAAAGTATGAACTCTTGA | 5210  |  |
| AGQP01000002.1         | GTAGAATTAGAAAAATGAATTTTTAAAAAGTATGAACTCTTGA | 5210  |  |
| JSZS01000049.1         | GTAGAATTAGAAAAATGAATTTTTAAAAAGTATGAACTCTTGA | 5210  |  |
| JTAG01000063.1         | GTAGAATTAGAAAAATGAATTTTTAAAAAGTATGAACTCTTGA | 5210  |  |
| ABLH01000027.1         | GTAGAATTAGAAAAATGAATTTTTAAAAAGTATGAACTCTTGA | 5210  |  |
| AAEN01000017.1         | GTAGAATTAGAAAAATGAATTTTTAAAAAGTATGAACTCTTGA | 5210  |  |
| NZ_ABKG01000001.1      | GTAGAATTAGAAAAATGAATTTTTAAAAAGTATGAACTCTTGA | 5210  |  |
| QAE01000003.1          | GTAGAATTAGAAAAATGAATTTTTAAAAAGTATGAACTCTTGA | 5210  |  |
| NZ_AAEQ01000046.1      | GTAGAATTAGAAAAATGAATTTTTAAAAAGTATGAACTCTTGA | 5210  |  |
| AMD01000002.1          | GTAGAATTAGAAAAATGAATTTTTAAAAAGTATGAACTCTTGA | 5210  |  |
| JMPU01000016.1         | GTAGAATTAGAAAAATGAATTTTTAAAAAGTATGAACTCTTGA | 5210  |  |
| QAE01000001.1          | GTAGAATTAGAAAAATGAATTTTTAAAAAGTATGAACTCTTGA | 5210  |  |
| QAE01000002.1          | GTAGAATTAGAAAAATGAATTTTTAAAAAGTATGAACTCTTGA | 5210  |  |
| JHDS02000015.1         | GTAGAATTAGAAAAATGAATTTTTAAAAAGTATGAACTCTTGA | 5210  |  |
| PVLH01000002.1         | GTAGAATTAGAAAAATGAATTTTTAAAAAGTATGAACTCTTGA | 5209  |  |
| MVOA01000067.1         | GTAGAATTAGAAAAATGAATTTTTAAAAAGTATGAACTCTTGA | 5210  |  |
| QAEH01000002.1         | GTAGAATTAGAAAAATGAATTTTTAAAAAGTATGAACTCTTGA | 5210  |  |
| RQWM01000005.1         | GTAGAATTAGAAAAATGAATTTTTAAAAAGTATGAACTCTTGA | 5211  |  |
| LGCD01000038.1         | GTAGAATTAGAAAAATGAATTTTTAAAAAGTATGAACTCTTGA | 5222  |  |
| LGCC01000044.1         | GTAGAATTAGAAAAATGAATTTTTAAAAAGTATGAACTCTTGA | 5217  |  |
| Consensus              | GTAGAATTAGAAAAATGAATTTTTAAAAAGTATGAACTCTTGA |       |  |
| Conservation           |                                             |       |  |
